# Supplementary material for: Polydopamine-mediated synthesis of core–shell gold@calcium phosphate nanoparticles for enzyme immobilization
Source: Royal Society of Chemistry journal article supplement (doi:10.1039/c9bm00283a), 2019-01-01
Supplement: c9bm00283a1.pdf [file c9bm00283a1.pdf]

## Supporting Information

### **Polydopamine-Mediated Synthesis of Core-Shell Gold@Calcium Phosphate Nanoparticles for Enzyme immobilization**

Di Li,<sup>a,b</sup> Zheng Fang,<sup>a,b\*</sup> Hongwei Duan<sup>c\*</sup> and Li Liang<sup>a,b\*</sup>

<sup>a</sup> *State Key Laboratory of Food Science and Technology, Jiangnan University, Wuxi, Jiangsu, 214122, People's Republic of China*

<sup>b</sup> *School of Food Science and Technology, Jiangnan University, Wuxi, Jiangsu, 214122, People's Republic of China*

<sup>c</sup> *School of Chemical and Biomedical Engineering, Nanyang Technological University, 70 Nanyang Drive, Singapore 637457, Singapore.*

E-mails: [liliang@jiangnan.edu.cn](mailto:liliang@jiangnan.edu.cn), [zhengfang@jiangnan.edu.cn](mailto:zhengfang@jiangnan.edu.cn), [hduan@ntu.edu.sg](mailto:hduan@ntu.edu.sg)

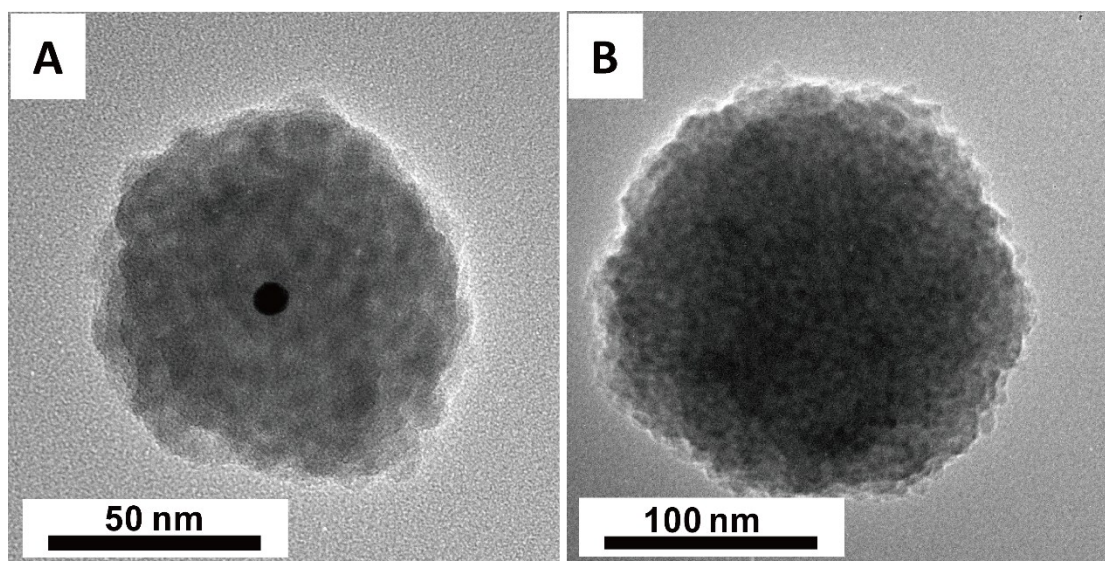

Figure S1. TEM image of a typical (A) Au@PDA@CaP-GOx and (B) N-CaP-GOx nanostructure.

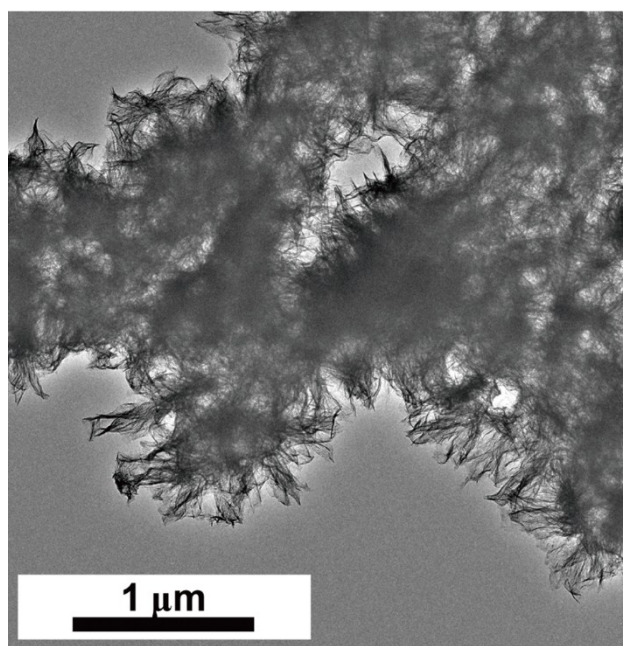

Figure S2. TEM image of bulk CaP-GOx.

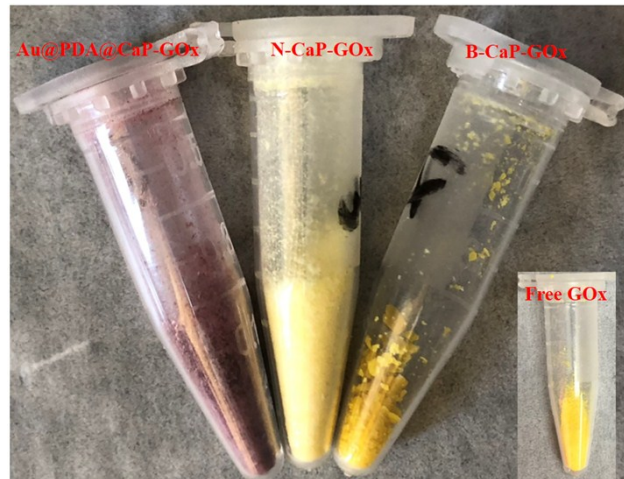

Figure S3. Photograph of the lyophilized powders of immobilized and free GOx.

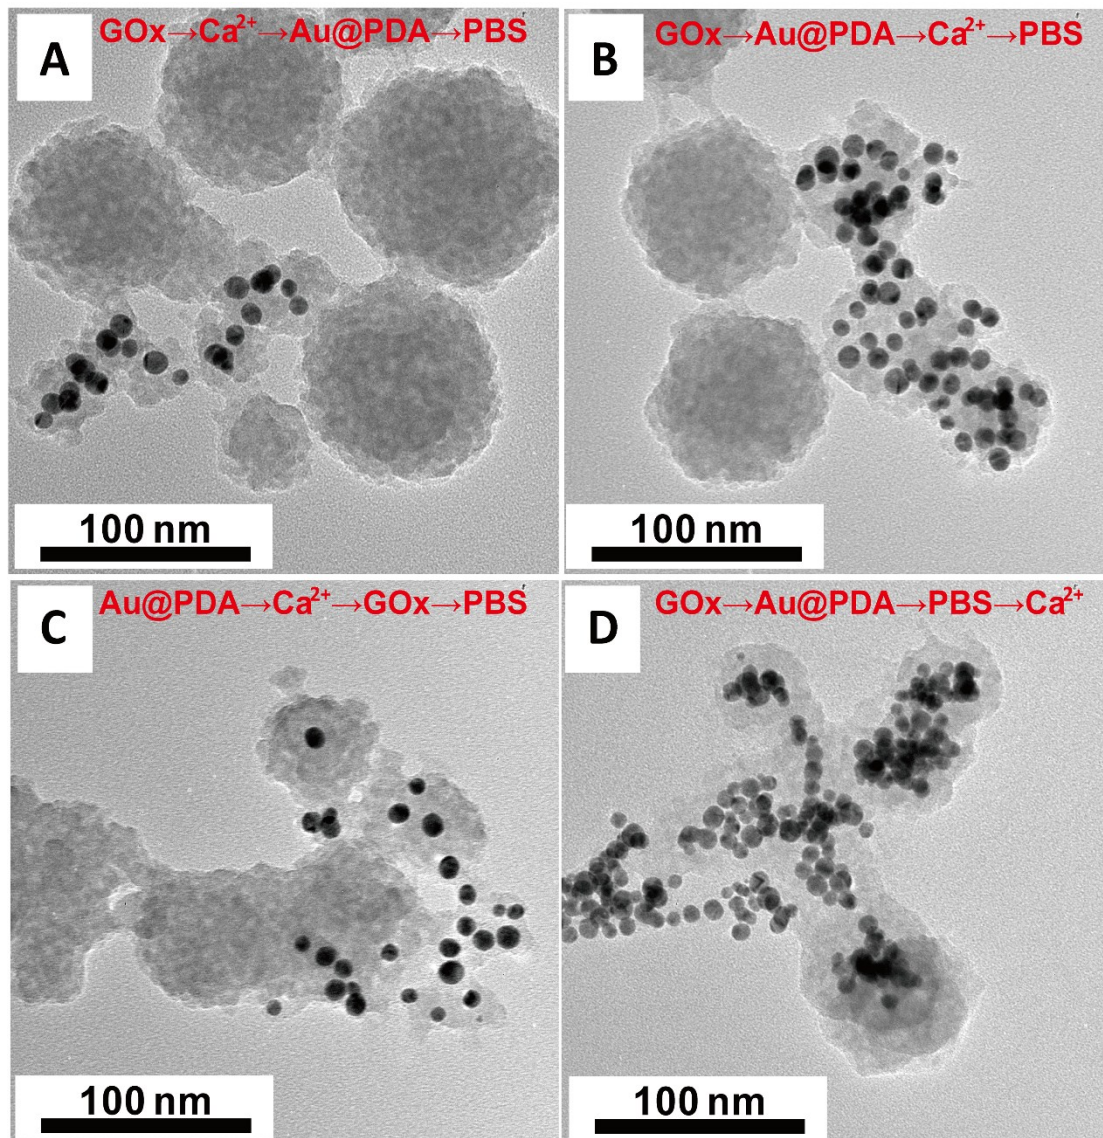

Figure S4. TEM images of Au@PDA@CaP-GOx samples with different adding

sequences of precursors (Table S1). The samples were prepared by adding 0.25  $\mu\text{mol}$  of Au@PDA NPs and 20  $\mu\text{mol}$  of  $\text{Ca}^{2+}$ , with growth time of 120 min

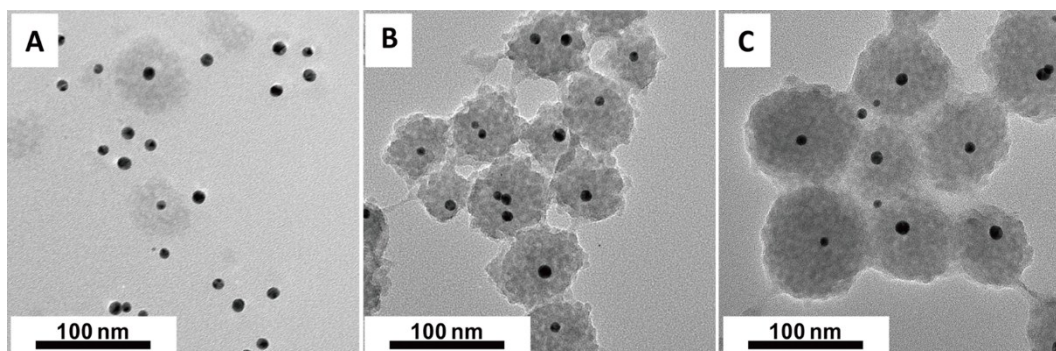

Figure S5. TEM images of Au@PDA@CaP-GOx NPs with addition of (A) 5, (B) 10 and (C) 15  $\mu\text{mol}$   $\text{Ca}^{2+}$ . The experiment conditions for Au@PDA@CaP-GOx NPs growth were addition of 0.25  $\mu\text{mol}$  Au@PDA NPs, feeding sequence of  $\text{GOx} \rightarrow \text{Au@PDA} \rightarrow \text{PBS} \rightarrow \text{Ca}^{2+}$  and growth time of 120 min.

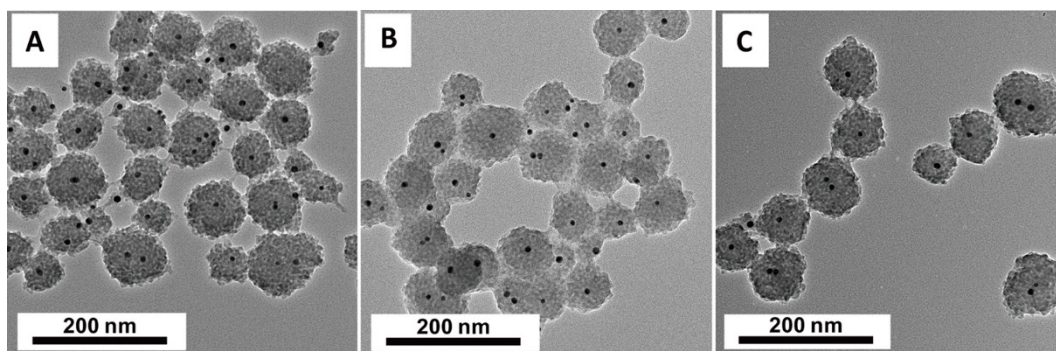

Figure S6. TEM images of Au@PDA@CaP-GOx NPs during growth of CaP-GOx shell for (A) 40, (B) 60 and (C) 80 min. The samples were prepared by adding 0.25  $\mu\text{mol}$  of Au@PDA NPs and 20  $\mu\text{mol}$  of  $\text{Ca}^{2+}$ , and employing feeding sequence of  $\text{GOx} \rightarrow \text{Au@PDA} \rightarrow \text{PBS} \rightarrow \text{Ca}^{2+}$ .

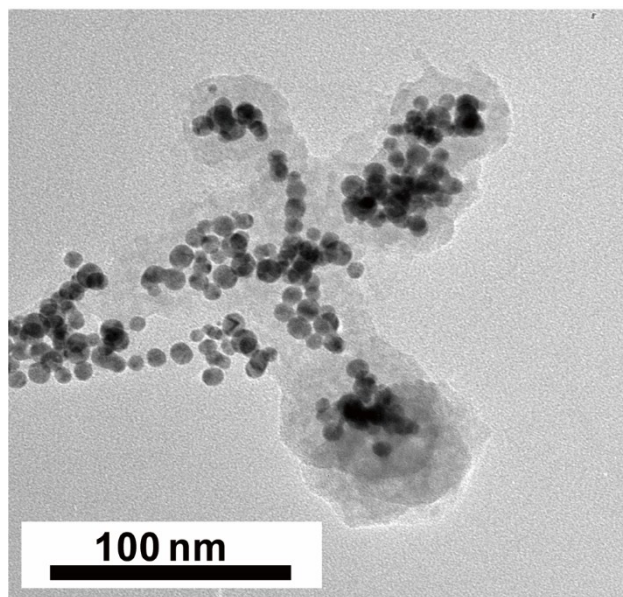

Figure S7. TEM image of the samples prepared by using lipoic acid-stabilized Au NPs as cores.

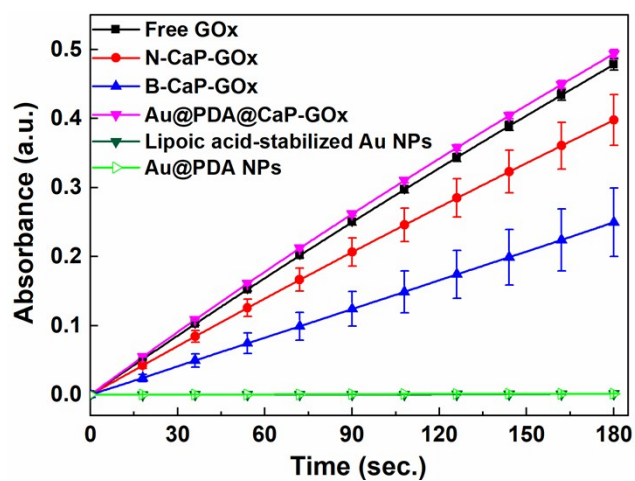

Figure S8. Absorbance at 729 nm as a function of reaction time. Activities of all samples were examined spectrometrically at  $\lambda=729$  nm based on the colorimetric assay resulting from oxidation of ABTS in the presence of horseradish peroxidase by hydrogen peroxide, a product from the reaction of glucose with  $O_2$  catalyzed by GOx.

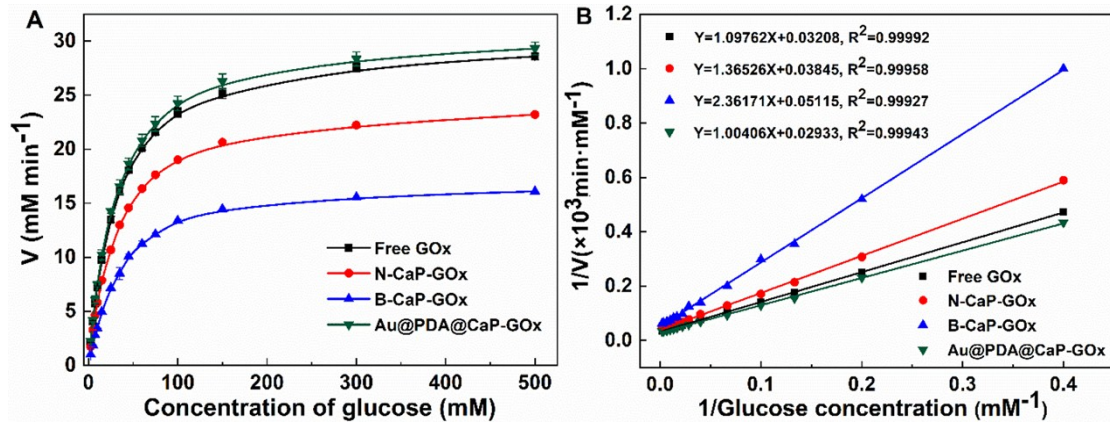

Figure S9. (A) Effect of substrate concentration on reaction velocity of free and immobilized GOx. (B) Lineweaver–Burk plots for free GOx, N-CaP-GOx, B-CaP-GOx and Au@PDA@CaP-GOx. Results are the mean of triplicates.

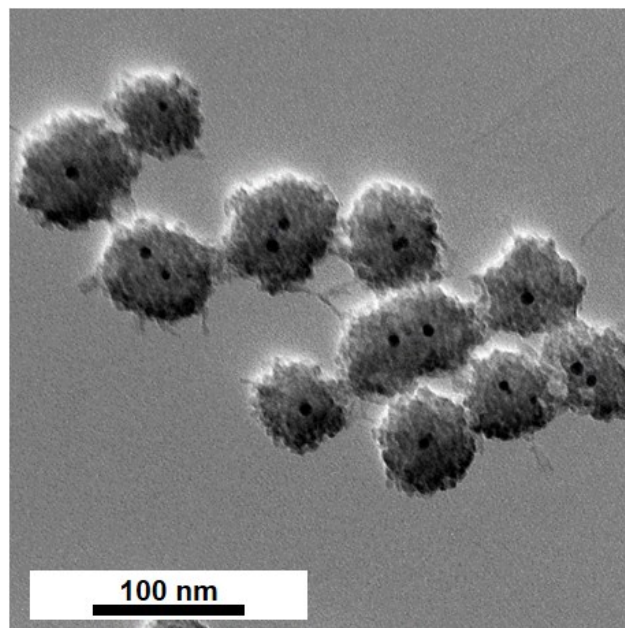

Figure S10. TEM image of Au@PDA@CaP-lactase.

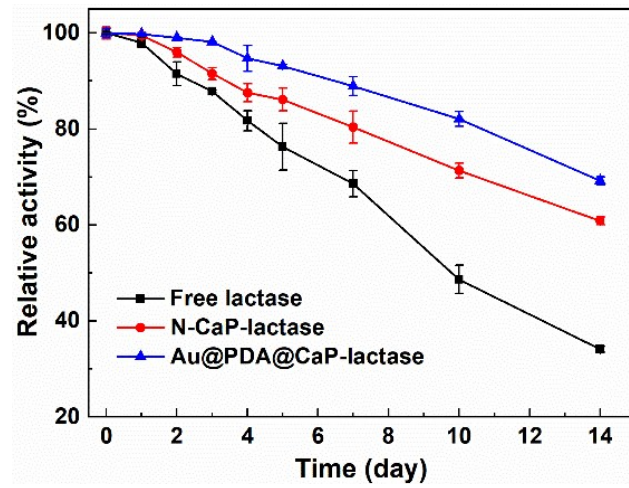

Figure S11. Long-term storage stability of free and immobilized lactase at 25°C.
